# Supplementary material for: Colon-targeted piperine–glycyrrhizic acid nanocrystals for ulcerative colitis synergetic therapyviamacrophage polarization
Source: Royal Society of Chemistry journal article supplement (doi:10.1039/d3tb02312e), 2024-01-01
Supplement: d3tb02312e1.pdf [file d3tb02312e1.pdf]

**Table S1.** The Characteristics of ES100-PIP/GA NCs (mean  $\pm$  SD, n = 3)

| Nanocrystals     | Particle Size    |                  | Zeta-potential (mV) | EE(%)             |                   | DL(%)             |                   |
|------------------|------------------|------------------|---------------------|-------------------|-------------------|-------------------|-------------------|
|                  | (nm)             | PDI              |                     | PIP               | GA                | PIP               | GA                |
| PIP/GA NCs       | 225.6 $\pm$ 2.85 | 0.150 $\pm$ 0.05 | -31.1 $\pm$ 0.64    | 91.79 $\pm$ 0.002 | 99.14 $\pm$ 0.001 | 47.86 $\pm$ 0.001 | 24.84 $\pm$ 0.001 |
| ES100-PIP/GA NCs | 206.1 $\pm$ 0.26 | 0.378 $\pm$ 0.01 | -31.6 $\pm$ 0.31    | 80.79 $\pm$ 0.006 | 98.55 $\pm$ 0.002 | 37.27 $\pm$ 0.002 | 24.29 $\pm$ 0.003 |

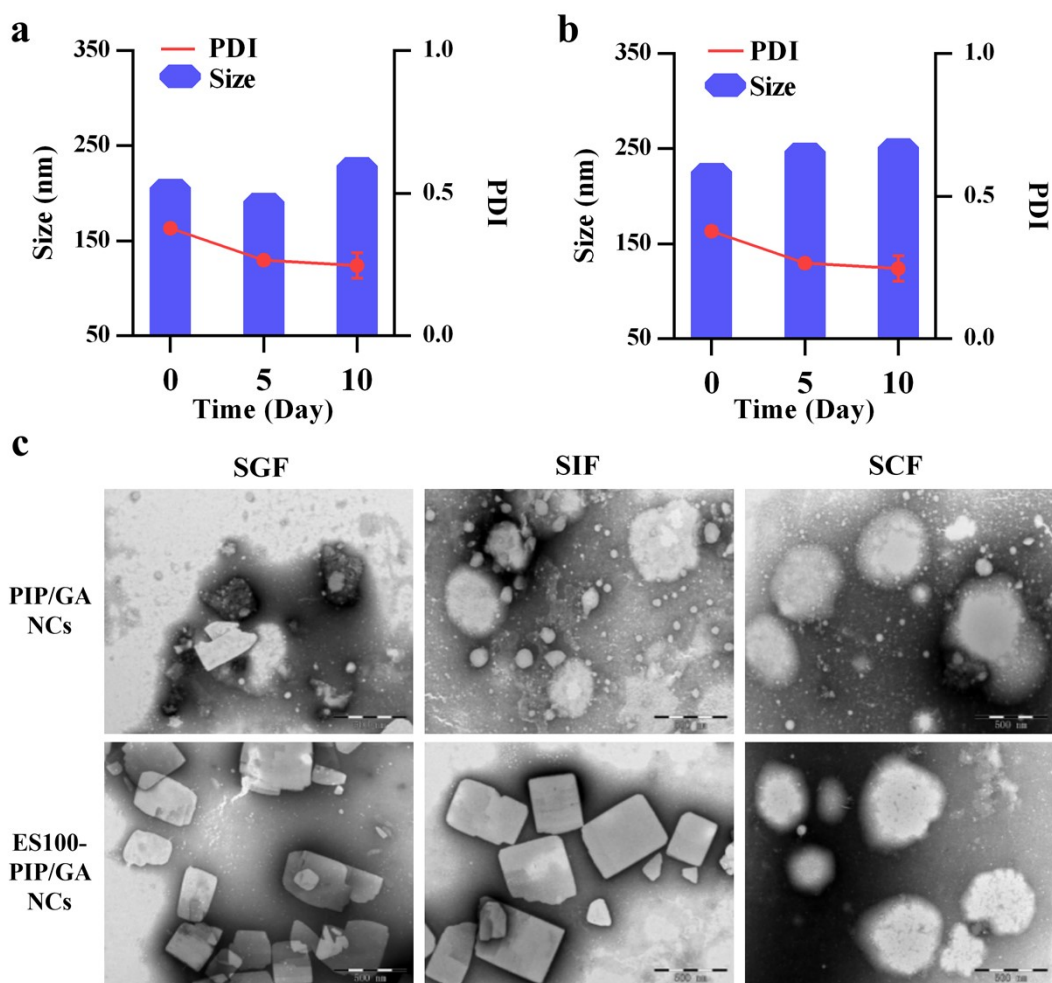

**Fig. S1.** Characterization of ES100-PIP/GA NCs. hydrodynamic particle size and polydispersity index (PDI) of (a) PIP/GA NCs and (b) ES100-PIP/GA NCs after at 4 °C for different time. (c) TEM of PIP/GA NCs and ES100-PIP/GA NCs in simulated digestive solutions.

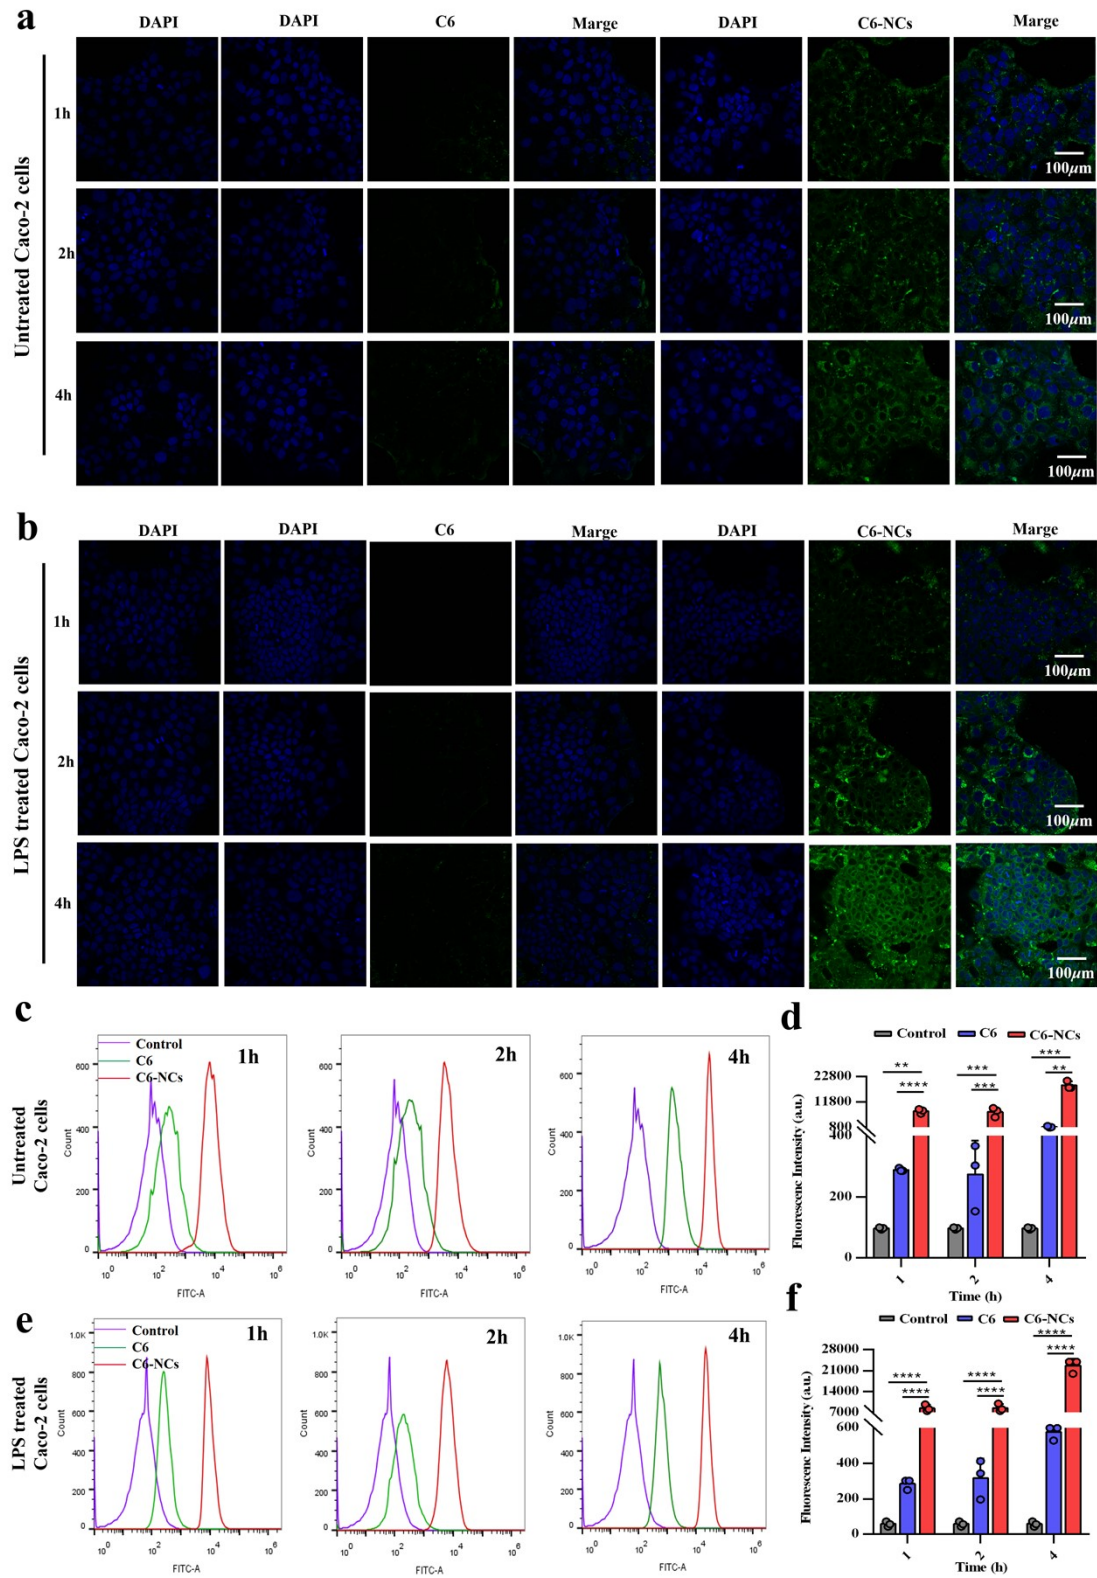

**Fig. S2.** *In vitro* cell uptake of different NCs. Laser confocal microscopy showed that free C6 and C6-NCs pretreated Caco-2 (a) and LPS treated Caco-2 (b) cells for 1, 2 and 4 h, and untreated cells were used as negative controls. Scale bar is 100  $\mu\text{m}$ . FCM

histogram of internalization of C6 and C6 NCs in Caco-2 (c) and LPS treated Caco-2 (e) cells after incubation for 1, 2 and 4 h. Fluorescence intensity of Caco-2 (d) and LPS treated Caco-2 (f) cells after treatment with free C6 and C6-NCs. \* $p < 0.05$ , \*\* $p < 0.01$  and \*\*\* $p < 0.001$ .

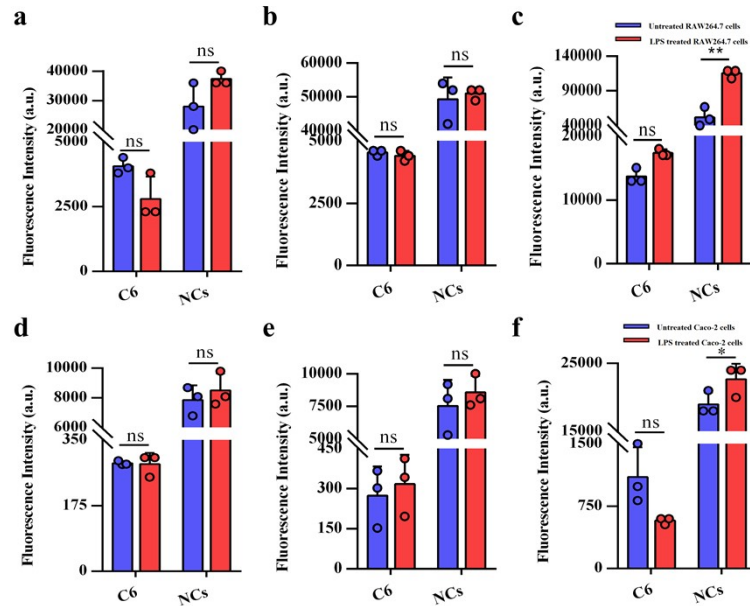

**Fig. S3.** *In vitro* cell uptake of different NCs. Fluorescence intensity of RAW 264.7 and LPS treated RAW 264.7 after incubation with free C6 and C6-NCs for 1 h (a), 2 h (b) and 4 h (c). Fluorescence intensity of Caco-2 and LPS treated Caco-2 after incubation with free C6 and C6-NCs for 1 h (d), 2 h (e) and 4 h (f). \* $p < 0.05$  and \*\* $p < 0.01$ .

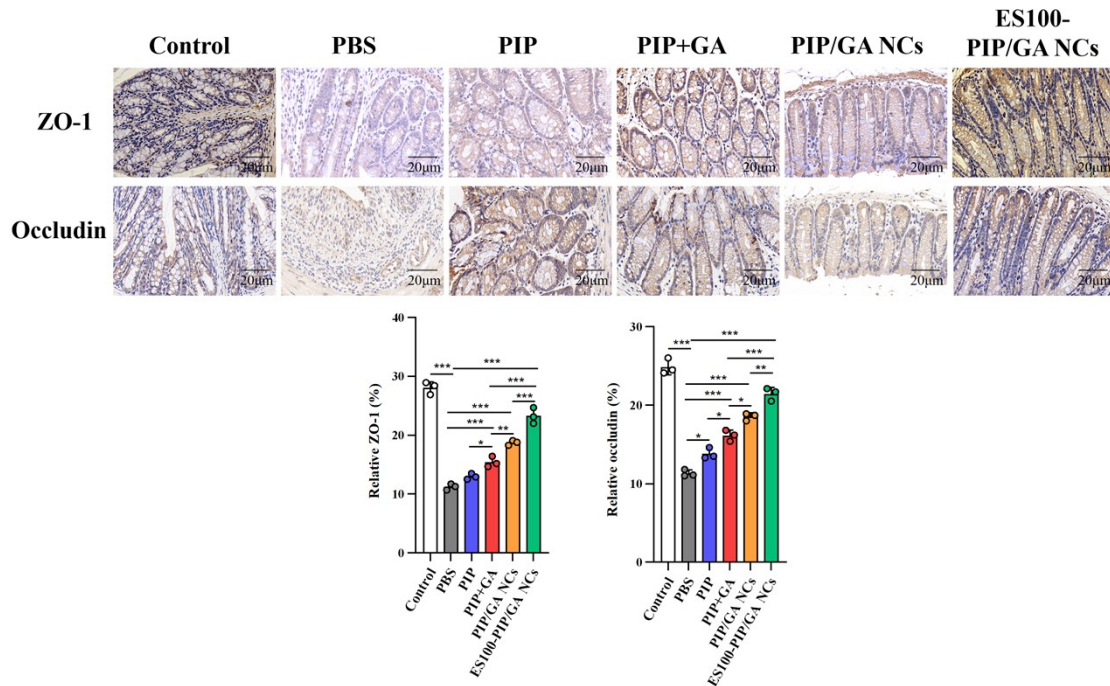

**Fig. S4.** ES100-PIP/GA NCs improved the tight junctions of the colonic epithelial barrier in mice. Immunohistochemical results of ZO-1 and occludin in colon tissue. Scale bar = 20  $\mu$ m

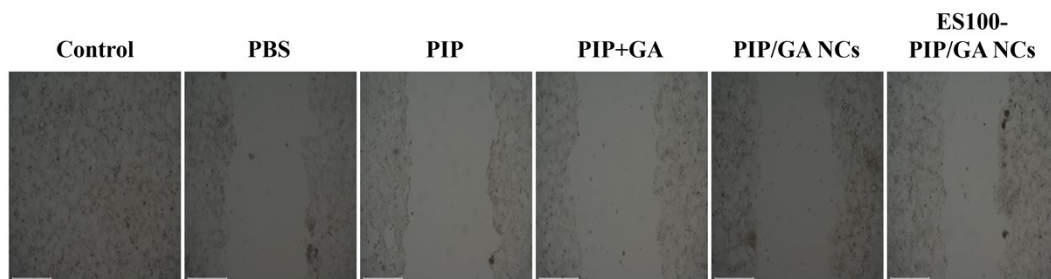

**Fig. S5.** Repair ability of intestinal epithelial cells in vitro. Cell migration of Caco-2 after 24 h treatment. Scale bars = 1000  $\mu$ m.

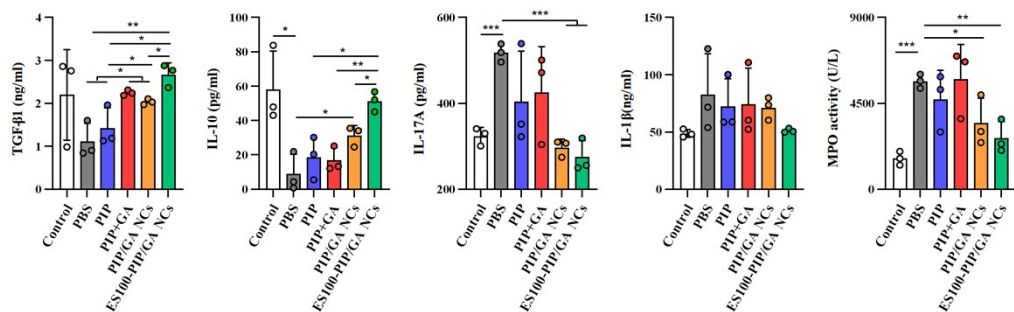

**Fig. S6.** ES100-PIP/GA NCs improved inflammatory factors in the mice's blood. The expression of TGF- $\beta$ 1 (a), IL-17A (b), IL-10 (c), IL-1 $\beta$  (d), MPO activity (e) in serum

was determined by ELISA kit. \* $p < 0.05$ , \*\* $p < 0.01$  and \*\*\* $p < 0.001$ .

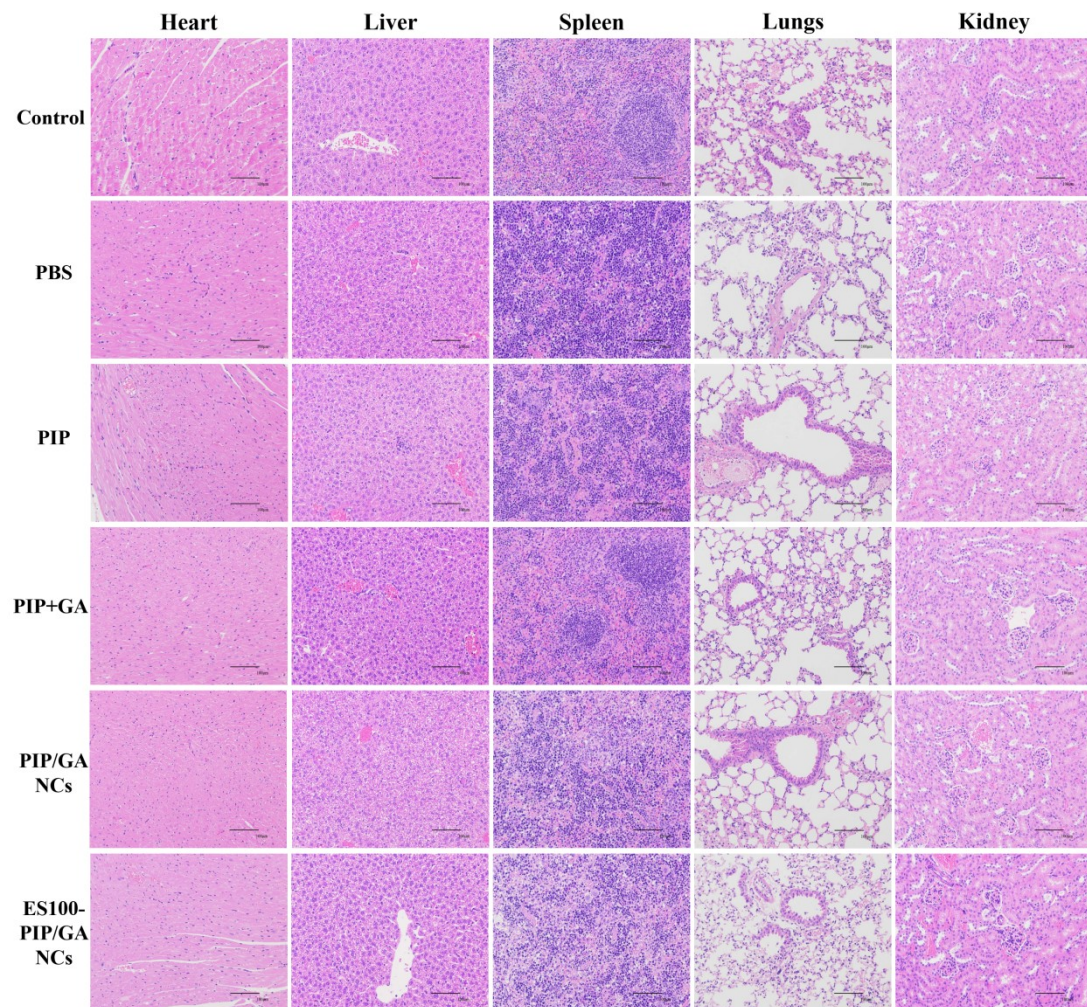

**Fig. S7.** *In vivo* biosafety evaluation of ES100-PIP/GA NCs. H&E staining of main organs slices from mice. Scale bar = 100 µm.
